# Supplementary material
Source: publisher figshare collection journal article supplement (https://acs.figshare.com/ndownloader/files/17387783)

# Supporting Information

## One-Step Heck Reaction Generates Non-Immunosuppressive FK506 Analogs for Pharmacological BMP Activation

Yuefan Wang<sup>1,2</sup>, Brandon Peiffer<sup>1,2</sup>, Qi Su<sup>3</sup>, Jun O Liu<sup>1,2</sup>

<sup>1</sup>Department of Pharmacology, Johns Hopkins School of Medicine, Baltimore, MD 21205, USA.

<sup>2</sup>The SJ Yan and HJ Mao Laboratory of Chemical Biology, Johns Hopkins School of Medicine, Baltimore, MD 21205, USA.

<sup>3</sup>Department of Chemistry, Johns Hopkins University, 3400N. Charles St., Baltimore, MD 21218, USA

Email: [joliu@jhu.edu](mailto:joliu@jhu.edu)

## Table of Contents

|                                                                                                                          |    |
|--------------------------------------------------------------------------------------------------------------------------|----|
| E x p e r i m e n t a l<br>Methods.....                                                                                  | 3  |
| E x p e r i m e n t a l<br>Data.....                                                                                     | 5  |
| Optimization of the Heck reaction conditions (Table S1).....                                                             | 5  |
| General procedure for the Heck<br>reaction.....                                                                          | 6  |
| Statistical data for BMP reporter EC <sub>50</sub> analysis (Table<br>S2).....                                           | 9  |
| Figure S1. Proposed workflow for identification of clinic-ready FK506 analogs for pharmacological<br>BMP activation..... | 10 |
| S p e c t r o s c o p i c<br>Data.....                                                                                   | 11 |

## EXPERIMENTAL METHODS AND EQUIPMENT

Normal phase disposable flash columns RediSep®Rf for flash chromatography were purchased from Teledyne Isco, Inc. Solvent was used extra dry over molecular sieve, stabilized, AcroSeal®. Yields refer to chromatographically homogeneous materials. Reactions were monitored by mass spectrometry provided by Agilent 6120 Quadrupole LC/MS. PLC Silica gel 60 F<sub>254</sub>, 1mm supplied by EMD Millipore using UV light as visualizing agent.

<sup>1</sup>H-NMR was recorded on Bruker Avance III 500 MHz NMR spectrometer. TMS was used as internal standard for <sup>1</sup>H-NMR (0 ppm). High-resolution mass spectra (HRMS) were recorded on Waters Synapt G2-Si mass spectrometer using ESI (electrospray ionization). FK-506 (Tacrolimus) was purchased from Biotang Inc. Zhan-1b catalyst, palladium acetate and tris(o-tolyl)phosphine were purchased from Aldrich.

### Cell Culture and Transfections

Jurkat (E6.1, ATCC) cells were cultured in RPMI (buffered to pH=7.5) with 10% FBS and 1.5% PennStrep. Jurkat cells (1 x 10<sup>6</sup>) were transfected with 10 µg of BRE-Luciferase (kindly provided by Martine Roussel & Peter ten Dijke) or NFAT-Luciferase cDNA (Promega) by electroporation (BioRad, square-wave, 250V, 950µF) in 400 µL serum/antibiotic free RPMI with 0.5% DMSO. Thirty minutes after transfection, cells were transferred to complete RPMI and rested overnight. Before plating, cells were re-suspended in fresh media and diluted to 0.5x10<sup>6</sup> cells/mL. HUVEC cells were cultured in Lonza Endothelial cell Growth Medium (EGM-2) and used between passages 3 and 7.

All cells were grown and assayed at pH=7.5 (extracellular)\*, 37°C, with 5% added CO<sub>2</sub>.

\*In the pH range between 6.8 and 7.4, lymphocytes maintain a constant internal pH of 7.17 +/- 0.06 pH unit.

### Cell Viability Assays

HUVEC cells were plated at 1000 cells/well in 180µL growth media before addition of 20µL of 10X drug/protein stock. After 72-hour treatment, 22uL of a resazurin sodium salt solution (0.1mg/mL stock in water) was added to each well and allowed to incubate at 37°C. The metabolic conversion of resazurin dye was monitored by absorbance at 570nm after 6 hours. After background subtraction (media only + dye), absorbance values were left as arbitrary absorbance units or normalized to those obtained by DMSO.

### **BMP and NFAT Pathway Reporters**

Jurkat cells used for each experiment were transfected at the same time and cultured together overnight until plating and treatment the following day.

Jurkat T cells transfected with BRE-Luc were split into a 96-well plate (80uL/well of  $0.5 \times 10^6$  cells/mL) and treated with previously stated compounds (20μL of 5X stock in RPMI, 0.5% DMSO) for 18 hours. Cells were lysed and measured for luminescence as previously reported (Peiffer et al., 2018). Luminescence values were background subtracted (lysis buffer + substrate) and normalized to DMSO control values.

Jurkat T cells transfected with NFAT-Luc were split into a 96-well plate (80uL/well of  $0.5 \times 10^6$  cells/mL) and treated with indicated compounds (20μL of 5X stock in RPMI, 0.5% DMSO) 30 min before activation with PMA/Ionomycin (40nM/1μM). After 6 hours, wells were lysed and measured for luminescence as previously stated (B. Peiffer et al., 2018). FK506 and served as positive control while DMSO and non-activated wells gave negative and background control values, respectively.

### **Western Blot**

Jurkat cells were plated at  $1.5 \times 10^6$  cells/well in a 12 well plate before addition of compounds or vehicle control (DMSO). After 2 hours, cells were collected, centrifuged (300g, 5min), and washed with PBS before lysis with 75μL RIPA buffer (including protease/phosphatase inhibitor cocktail, Cell Signaling Technologies). Protein levels were normalized with DC protein assay (BioRad), and boiled with 4X laemmli buffer. 25ug of each cell lysate was run on a 10% PAGE gel before transfer to a nitrocellulose (0.2μm) membrane. Blots were blocked with milk and stained overnight at 4°C with primary antibodies for phosphor-SMAD1/5 (1:500, Cell Signaling Technologies) and HSP90 (Loading control, 1:1000, Santa Cruz). After washing, secondary antibodies (HRP conjugate, 1:7500, Cell Signaling Technologies) were incubated for 2 hours before washing and addition of chemi-luminescent substrate. Developed blots were imaged on a SynGene gel imager.

### **EC<sub>50</sub> Calculations**

Calculations were performed using GraphPad Prism 6. Curves were fit using non-linear, log(agonist) vs. response (three parameters). 95% confidence intervals of EC50 values are reported below.

## EXPERIMENTAL DATA

### Optimization of Heck reaction conditions:

To a mixture of FK-506 (0.0500 mmol, 40 mg, 1.0 equiv), Pd(OAc)<sub>2</sub> (0.00500 mmol, 1.1 mg, 0.10 equiv), P(*o*-tol)<sub>3</sub> (0.0100 mmol, 3.0 mg, 0.20 equiv), base and additives in flame-dried 10 mL-Schlenk tube, dry DMF (1.0 mL) was added under Ar balloon protection, and the mixture was stirred at specific temperature. The reactions were monitored by mass spectrometry.

**Table S1. Survey of best reaction condition for Heck reaction**

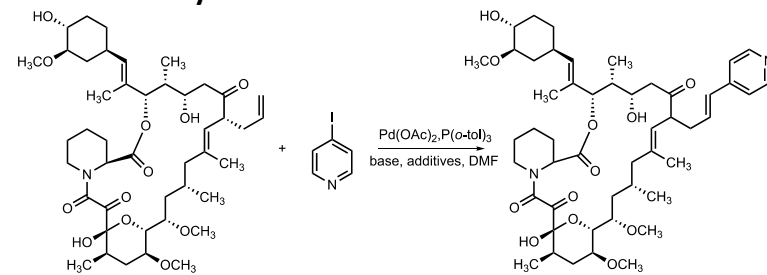

| Entry | base                           | additives                                          | temperature | time / h | Yield (%) <sup>b</sup> |
|-------|--------------------------------|----------------------------------------------------|-------------|----------|------------------------|
| 1     | NaHCO <sub>3</sub>             | <sup>n</sup> Bu <sub>4</sub> NBr                   | 100 °C      | 24       | N. D.                  |
| 2     | NaHCO <sub>3</sub>             | none                                               | 100 °C      | 24       | decomposed             |
| 3     | K <sub>2</sub> CO <sub>3</sub> | <sup>n</sup> Bu <sub>4</sub> NBr, H <sub>2</sub> O | 50 °C       | 2        | decomposed             |
| 4     | NaHCO <sub>3</sub>             | <sup>n</sup> Bu <sub>4</sub> NCl                   | 100 °C      | 24       | decomposed             |
| 5     | 2,6-lutidine                   | none                                               | 100 °C      | 24       | low conversion         |
| 6     | Et <sub>3</sub> N              | none                                               | 100 °C      | 24       | 66                     |

### General procedure for the Heck reaction

To a mixture of FK-506 (0.0500 mmol, 40 mg, 1.0 equiv), aryl halides (2.0 equiv) and Pd(OAc)<sub>2</sub> (0.00500 mmol, 1.1 mg, 0.10 equiv) and P(*o*-tol)<sub>3</sub> (0.0100 mmol, 3.0 mg, 0.20 equiv) in flame-dried 10 mL-Schlenk tube, dry DMF (1.0 mL) and Et<sub>3</sub>N (0.10 mL) dried over K<sub>2</sub>CO<sub>3</sub> was added under Ar balloon protection, and the mixture was stirred at 100 °C. The reactions were monitored by mass spectrometry. When the reaction was finished, the reaction mixture cooled to room temperature, and was purified by flash column with gradient solvent (dichloromethane and methanol) to give the corresponding product. If necessary, PLC was used as further purification to separate epimers.

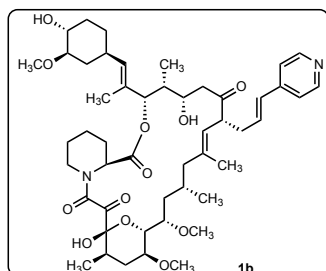

1b: <sup>1</sup>H-NMR (500MHz, CDCl<sub>3</sub>) 8.51 (br s, 2H), 7.18 (br s, 2H), 6.40-6.32

(m, 2H), 5.33 and 5.18 (rotamers, d,  $J = 1.05$ , 1H), 5.11-5.05 (m, 2H), 4.99 and 4.65 (rotamers, d,  $J = 4.55$ , 1H), 4.71 and 4.24 (rotamers, s, 1H), 4.43 and 3.72 (rotamers, d,  $J = 12.5$ , 1H), 3.94-3.84 (m, 1H), 3.72-3.61 (m, 2H), 3.44-3.35 (m, 9H), 3.34-3.29 (m, 3H), 3.06-2.96 (m, 2H), 2.84-2.61 (m, 3H), 2.33-2.25 (m, 2H), 2.21-1.96 (m, 7H), 1.95-1.85 (m, 2H), 1.72-1.44 (m, 18H), 1.03-0.81 (m, 11H); HRMS (ESI):  $m/z$  calcd for  $C_{49}H_{73}N_2O_{12}$   $[M+H]^+$ : 881.5164, found 881.5164.

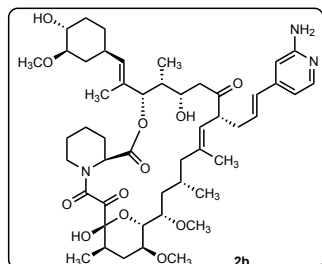

2b:  $^1H$ -NMR (500MHz,  $CDCl_3$ ) 7.93 (br s, 1H), 6.60 (br s, 1H), 6.38 (br s, 1H), 6.32-6.18 (m, 2H), 5.33 and 5.18 (rotamers, d,  $J = 1.05$ , 1H), 5.12-5.02 (m, 2H), 4.94 and 4.64 (rotamers, d,  $J = 4.50$ , 1H), 4.69 (br s, 2H), 4.43 and 3.72 (rotamers, d,  $J = 14.6$ , 1H), 3.95-3.84 (m, 1H), 3.74-3.66 (m, 1H), 3.60-3.53 (m, 1H), 3.46-3.23 (m, 12H), 3.04-2.99 (m, 2H), 2.82-2.62 (m, 2H), 2.40-2.24 (m, 4H), 2.17-1.99 (m, 8H), 1.85-1.71 (m, 3H), 1.71-1.31 (m, 16H), 1.03-0.82 (m, 11H); HRMS (ESI):  $m/z$  calcd for  $C_{49}H_{74}N_3O_{12}$   $[M+H]^+$ : 896.5272, found 896.5261.

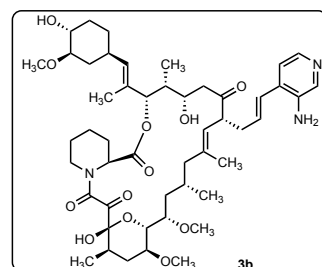

3b:  $^1H$ -NMR (500MHz,  $CDCl_3$ ) 8.04 (s, 1H), 7.95 (s, 1H), 7.05-6.98 (m, 1H), 6.40-6.35 (m, 1H), 6.20-6.10 (m, 1H), 5.34 and 5.20 (rotamers, s, 1H), 5.12-5.04 (m, 2H), 4.94 and 4.64 (rotamers, d,  $J = 4.40$ , 1H), 4.43 and 3.72 (rotamers, d,  $J = 13.4$ , 1H), 4.00-3.90 (m, 1H), 3.72 (br s, 2H), 3.61-3.47 (m, 2H), 3.44-3.35 (m, 9H), 3.33-3.28 (m, 3H), 3.04-2.98 (m, 2H), 2.83-2.62 (m, 3H), 2.42-2.07 (m, 8H), 1.98-1.86 (m, 3H), 1.75-1.43 (m, 19H), 0.99-0.82 (m, 11H); HRMS (ESI):  $m/z$  calcd for  $C_{49}H_{74}N_3O_{12}$   $[M+H]^+$ : 896.5272, found 896.5262.

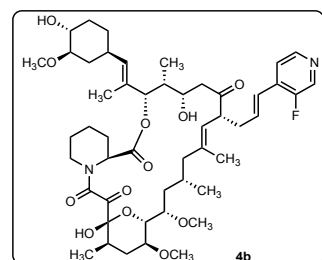

4b:  $^1H$ -NMR (500MHz,  $CDCl_3$ ) 8.40 (s, 1H), 8.31 (d,  $J = 4.6$ , 1H), 6.52-6.41 (m, 2H), 5.33 and 5.18 (rotamers, s, 1H), 5.12-5.02 (m, 2H), 4.99 and 4.65 (rotamers, d,  $J = 4.40$ , 1H), 4.72 and 4.24 (rotamers, s, 1H), 4.43 and 3.70 (rotamers, d,  $J = 14.6$ , 1H), 3.94-3.85 (m, 1H), 3.67-3.52 (m, 2H), 3.43-3.35 (m, 9H), 3.34-3.28 (m, 3H), 3.05-2.98 (m, 2H), 2.76-2.62 (m, 3H), 2.49-2.25 (m, 4H), 2.21-1.96 (m, 7H), 1.94-1.69 (m, 5H), 1.68-1.61 (m, 7H), 1.51-1.36 (m, 7H), 1.04-0.85 (m, 11H); HRMS (ESI):  $m/z$  calcd for  $C_{49}H_{72}N_2O_{12}F$   $[M+H]^+$ : 899.5069, found 899.5060.

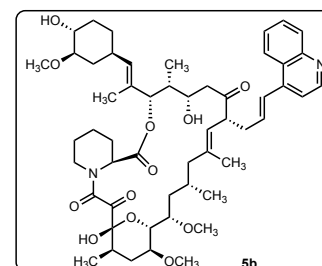

5b:  $^1H$ -NMR (500MHz,  $CDCl_3$ ) 8.82 (d,  $J = 4.55$ , 1H), 8.10-8.05 (m, 2H), 7.70 (t,  $J = 7.42$ , 1H), 7.55 (t,  $J = 7.52$ , 1H), 7.36 (dd,  $J = 9.2$ , 4.55, 1H), 7.10 (d,  $J = 15.6$ , 1H), 6.36 (dt,  $J = 15.4$ , 7.53, 1H), 5.34 and 5.20 (rotamers, s, 1H), 5.15-5.00 (m, 2H), 4.95 and 4.65 (rotamers, d,  $J = 4.85$ , 1H), 4.74 and 4.27 (rotamers, s, 1H), 4.43 and 3.72 (rotamers, d,  $J = 13.5$ , 1H), 4.14-3.79 (m, 2H), 3.73-3.65 (m, 1H), 3.60-3.51 (m, 2H), 3.44-3.35 (m, 9H), 3.34-3.29 (m, 3H), 3.04-2.98 (m, 2H), 2.88-2.73 (m, 2H), 2.57-2.44 (m, 1H), 2.36-2.07 (m, 6H), 2.05-1.93 (m, 4H), 1.87-1.66 (m, 9H), 1.61-1.33 (m, 8H), 1.03-0.78 (m, 11H); HRMS (ESI):  $m/z$  calcd for  $C_{53}H_{75}N_2O_{12}$   $[M+H]^+$ : 931.5320, found 931.5322.

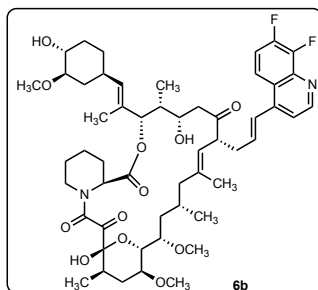

6b:  $^1\text{H-NMR}$  (500MHz,  $\text{CDCl}_3$ ) 8.89-8.86 (m, 1H), 7.85-7.81 (m, 1H), 7.53-7.36 (m, 2H), 7.06-6.99 (m, 1H), 6.45-6.32 (m, 1H), 5.78-5.67 and 5.40-5.34 (rotamers, m, 1H), 5.19-4.98 (m, 2H), 4.94 and 4.65 (rotamers, d,  $J = 5.00$ , 1H), 4.43 and 3.72 (rotamers, d,  $J = 13.9$ , 1H), 4.15-3.83 (m, 2H), 3.75-3.50 (m, 3H), 3.44-3.35 (m, 9H), 3.34-3.30 (m, 3H), 3.08-2.95 (m, 2H), 2.86-2.67 (m, 2H), 2.58-2.43 (m, 1H), 2.36-1.98 (m, 8H), 1.89-1.40 (m, 20H), 1.06-0.79 (m, 11H); HRMS (ESI):  $m/z$  calcd for  $\text{C}_{53}\text{H}_{73}\text{N}_2\text{O}_{12}\text{F}_2$   $[\text{M}+\text{H}]^+$ : 967.5132, found 967.5135.

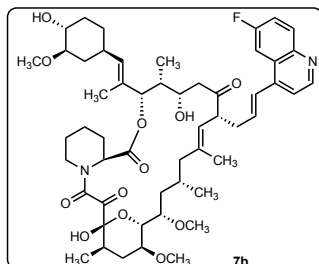

7b:  $^1\text{H-NMR}$  (500MHz,  $\text{CDCl}_3$ ) 8.79 (s, 1H), 8.14-8.06 (m, 1H), 7.66 (d,  $J = 9.50$ , 1H), 7.52-7.35 (m, 2H), 6.97 (d,  $J = 14.4$ , 1H), 6.41-6.31 (m, 1H), 5.34 and 5.20 (rotamers, s, 1H), 5.15-4.98 (m, 2H), 4.95 and 4.66 (rotamers, d,  $J = 4.85$ , 1H), 4.72 and 4.27 (rotamers, s, 1H), 4.43 and 3.70 (rotamers, d,  $J = 13.2$ , 1H), 4.14-3.85 (m, 2H), 3.74-3.50 (m, 3H), 3.47-3.27 (m, 12H), 3.15-3.10 (m, 2H), 2.87-2.64 (m, 3H), 2.59-2.43 (m, 1H), 2.38-2.19 (m, 3H), 2.04-1.73 (m, 6H), 1.70-1.46 (m, 17H), 1.10-0.85 (m, 11H); HRMS (ESI):  $m/z$  calcd for  $\text{C}_{53}\text{H}_{74}\text{N}_2\text{O}_{12}\text{F}$   $[\text{M}+\text{H}]^+$ : 949.5226, found 949.5234.

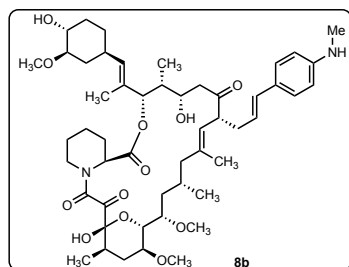

8b:  $^1\text{H-NMR}$  (500MHz,  $\text{CDCl}_3$ ) 7.17-7.13 (m, 2H), 6.54 (d,  $J = 8.30$ , 2H), 6.29 (d,  $J = 15.0$ , 1H), 5.90-5.82 (m, 1H), 5.32 and 5.20 (rotamers, s, 1H), 5.14-5.03 (m, 2H), 5.01 and 4.62 (rotamers, d,  $J = 4.10$ , 1H), 4.80 and 4.27 (rotamers, s, 1H), 4.43 and 3.73 (rotamers, d,  $J = 15.0$ , 1H), 3.97-3.86 (m, 2H), 3.69-3.64 (m, 1H), 3.59-3.55 (m, 1H), 3.42-3.35 (m, 10H), 3.34-3.29 (m, 3H), 3.04-2.98 (m, 2H), 2.83 (s, 3H), 2.75-2.54 (m, 3H), 2.35-2.24 (m, 3H), 2.16-1.97 (m, 6H), 1.84-1.70 (m, 4H), 1.68-1.59 (m, 11H), 1.50-1.39 (m, 4H), 1.03-0.85 (m, 11H); HRMS (ESI):  $m/z$  calcd for  $\text{C}_{51}\text{H}_{77}\text{N}_2\text{O}_{12}$   $[\text{M}+\text{H}]^+$ : 909.5477, found 909.5473.

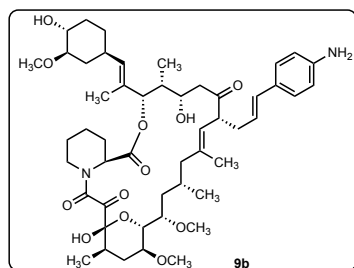

9b:  $^1\text{H-NMR}$  (500MHz,  $\text{CDCl}_3$ ) 7.13-7.09 (m, 2H), 6.61 (d,  $J = 8.15$ , 2H), 6.28 (d,  $J = 15.7$ , 1H), 5.92-5.84 (m, 1H), 5.32 and 5.19 (rotamers, s, 1H), 5.10-5.03 (m, 2H), 4.93 and 4.62 (rotamers, d,  $J = 5.05$ , 1H), 4.80 and 4.27 (rotamers, s, 1H), 4.43 and 3.74 (rotamers, d,  $J = 14.5$ , 1H), 3.97-3.89 (m, 1H), 3.69-3.64 (m, 1H), 3.61-3.52 (m, 2H), 3.42-3.37 (m, 9H), 3.32-3.28 (m, 3H), 3.03-2.98 (m, 2H), 2.75-2.63 (m, 2H), 2.33-2.25 (m, 3H), 2.20-2.03 (m, 6H), 1.83-1.72 (m, 3H), 1.66-1.48 (m, 19H), 1.00-0.86 (m, 11H); HRMS (ESI):  $m/z$  calcd for  $\text{C}_{50}\text{H}_{75}\text{N}_2\text{O}_{12}$   $[\text{M}+\text{H}]^+$ : 895.5320, found 895.5320.

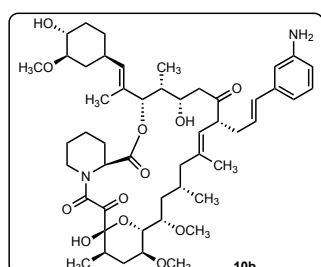

10b:  $^1\text{H-NMR}$  (500MHz,  $\text{CDCl}_3$ ) 7.07 (t,  $J = 7.75$ , 1H), 6.72-6.69 (m, 1H), 6.64 (s, 1H), 6.54 (d,  $J = 7.80$ , 1H), 6.30 (d,  $J = 15.7$ , 1H), 6.08-6.00 (m, 1H), 5.32 and 5.20 (rotamers, s, 1H), 5.12-5.04 (m, 2H), 4.94 and 4.64 (rotamers, s, 1H), 4.75 and 4.26 (rotamers, s, 1H), 4.43 and 3.69 (rotamers, d,  $J = 13.5$ , 1H), 3.98-3.89 (m, 1H), 3.72-3.57 (m, 3H), 3.47-

3.36 (m, 9H), 3.34-3.27 (m, 3H), 3.06-2.97 (m, 2H), 2.69-2.56 (m, 2H), 2.36-2.25 (m, 3H), 2.19-1.97 (m, 6H), 1.82-1.71 (m, 3H), 1.69-1.47 (m, 19H), 1.03-0.85 (m, 11H); HRMS (ESI):  $m/z$  calcd for  $C_{50}H_{75}N_2O_{12}$   $[M+H]^+$ : 895.5320, found 895.5320.

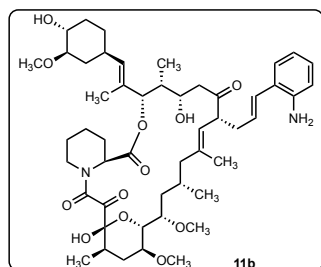

11b:  $^1H$ -NMR (500MHz,  $CDCl_3$ ) 7.15 (t,  $J = 7.50$ , 1H), 7.04(t,  $J = 7.65$ , 1H), 6.75-6.69 (m, 1H), 6.65 (d,  $J = 7.95$ , 1H), 6.42 (d,  $J = 15.6$ , 1H), 5.99-5.90 (m, 1H), 5.33 and 5.20 (rotamers, s, 1H), 5.14-5.04 (m, 2H), 4.95 and 4.62 (rotamers, d,  $J = 4.40$ , 1H), 4.73 and 4.31 (rotamers, s, 1H), 4.43 and 3.72 (rotamers, d,  $J = 13.6$ , 1H), 3.97-3.83 (m, 2H), 3.76-3.64 (m, 2H), 3.59-3.55 (m, 1H), 3.41-3.37 (m, 9H), 3.32-3.27 (m, 3H), 3.05-2.96 (m, 2H), 2.70-2.60 (m, 2H), 2.37-2.25 (m, 3H), 2.15-1.98 (m, 6H), 1.93-1.72 (m, 6H), 1.70-1.61 (m, 9H), 1.50-1.35 (m, 6H), 1.03-0.85

(m, 11H); HRMS (ESI):  $m/z$  calcd for  $C_{50}H_{75}N_2O_{12}$   $[M+H]^+$ : 895.5320, found 895.5316.

**Table S2.**  $EC_{50}$  values for BMP pathway reporter activation using top performing analogs.

| Compound | $EC_{50}$ (nM) |
|----------|----------------|
| 1        | 7.247 to 21.10 |



|       |                |
|-------|----------------|
| 2     | 19.87 to 46.96 |
| 3     | 16.07 to 34.08 |
| FK506 | 26.10 to 45.47 |

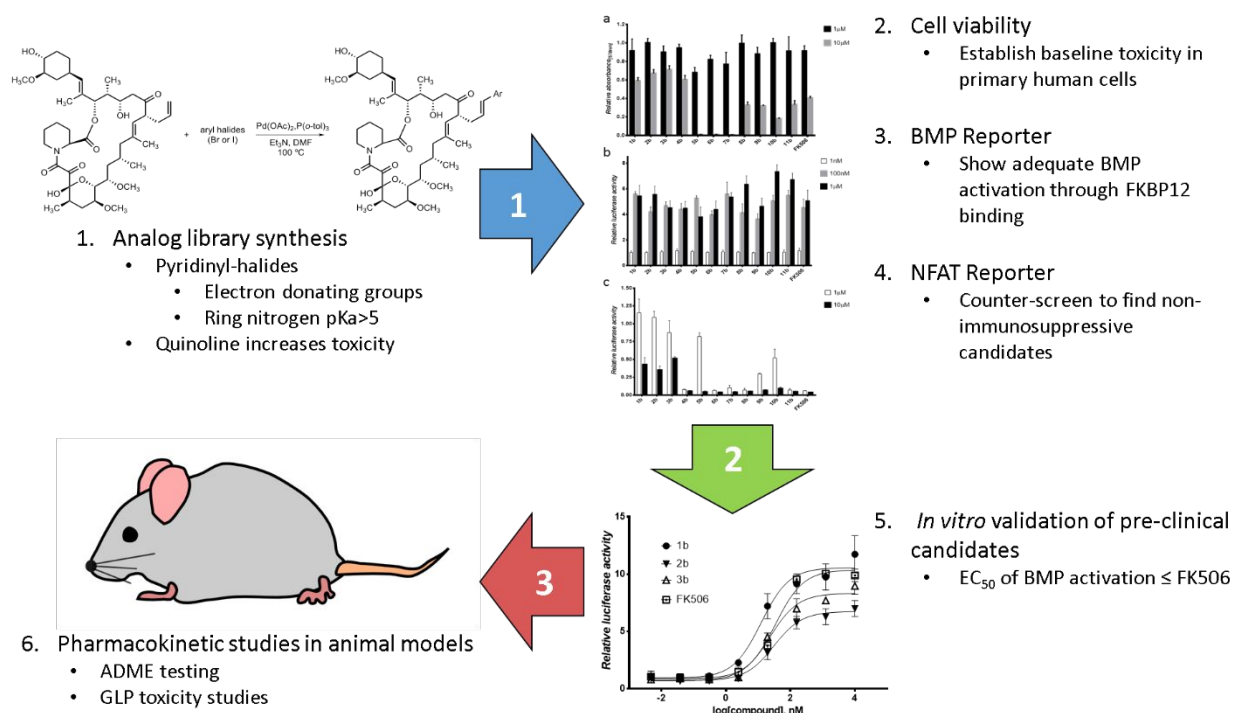

**Figure S1.** Proposed workflow for identification of clinic-ready FK506 analogs for pharmacological BMP activation. **(1)** A rationally designed FK506 analog library is screened using a high-throughput compatible, three-assay system. **(2)** Top performing candidates are then validated *in vitro* through EC<sub>50</sub> analysis in the BMP-reporter assay. **(3)** Validated compounds are moved into pre-clinical animal studies to determine inter-analog differences in ADME (absorption, distribution, metabolism, excretion) and *in vivo* toxicity profiles.

### 1b: <sup>1</sup>H-NMR

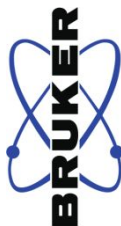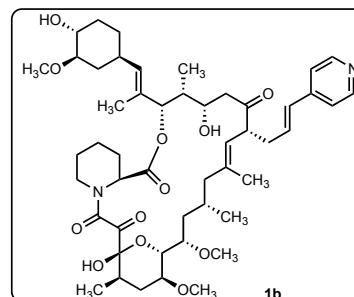

## 2b: <sup>1</sup>H-NMR

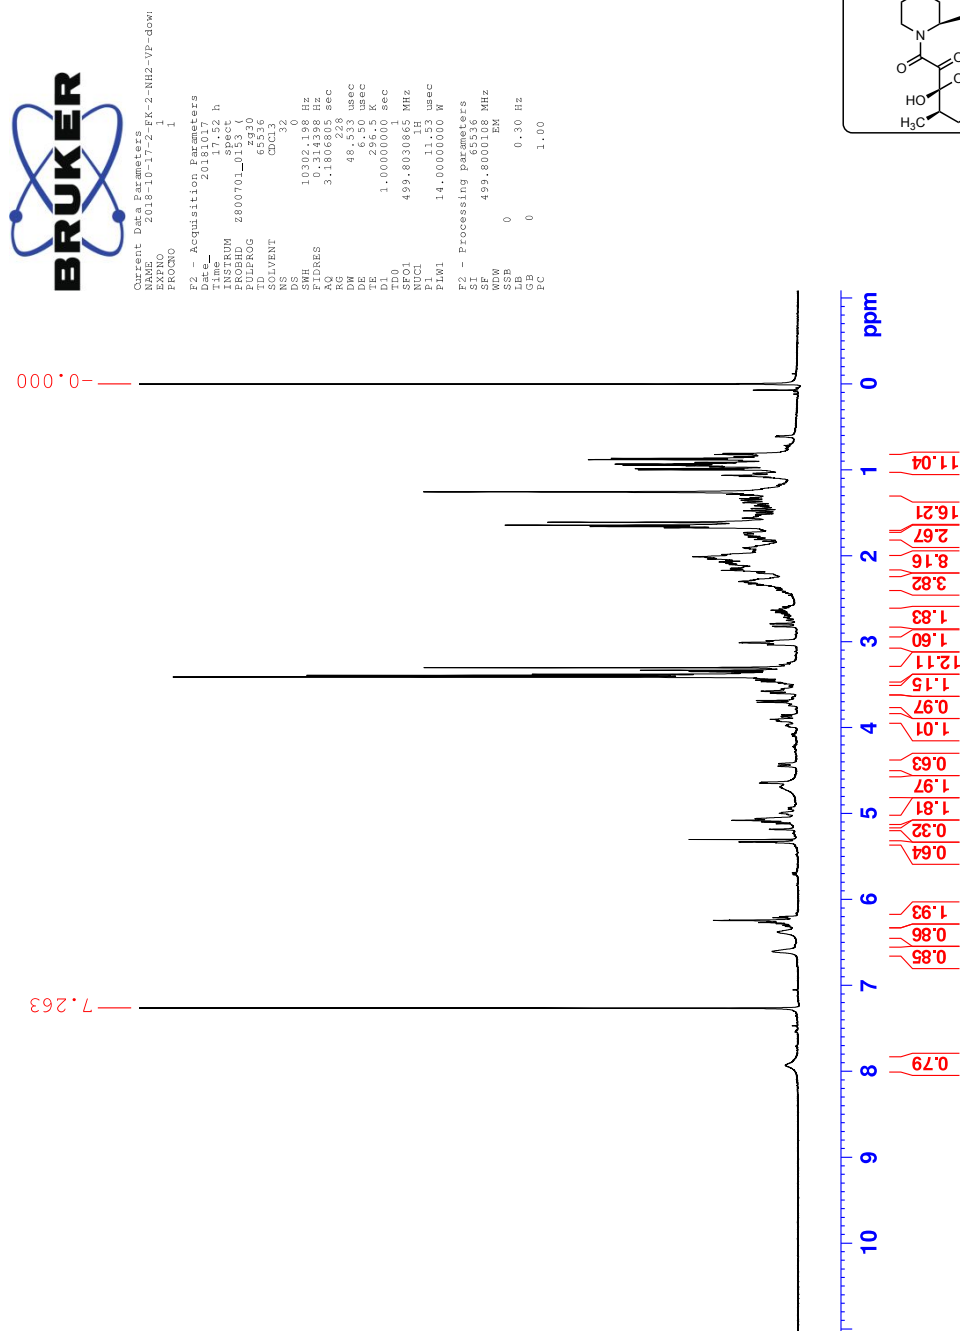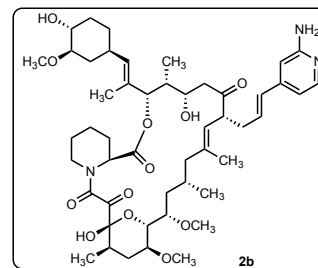

### 4b: <sup>1</sup>H-NMR

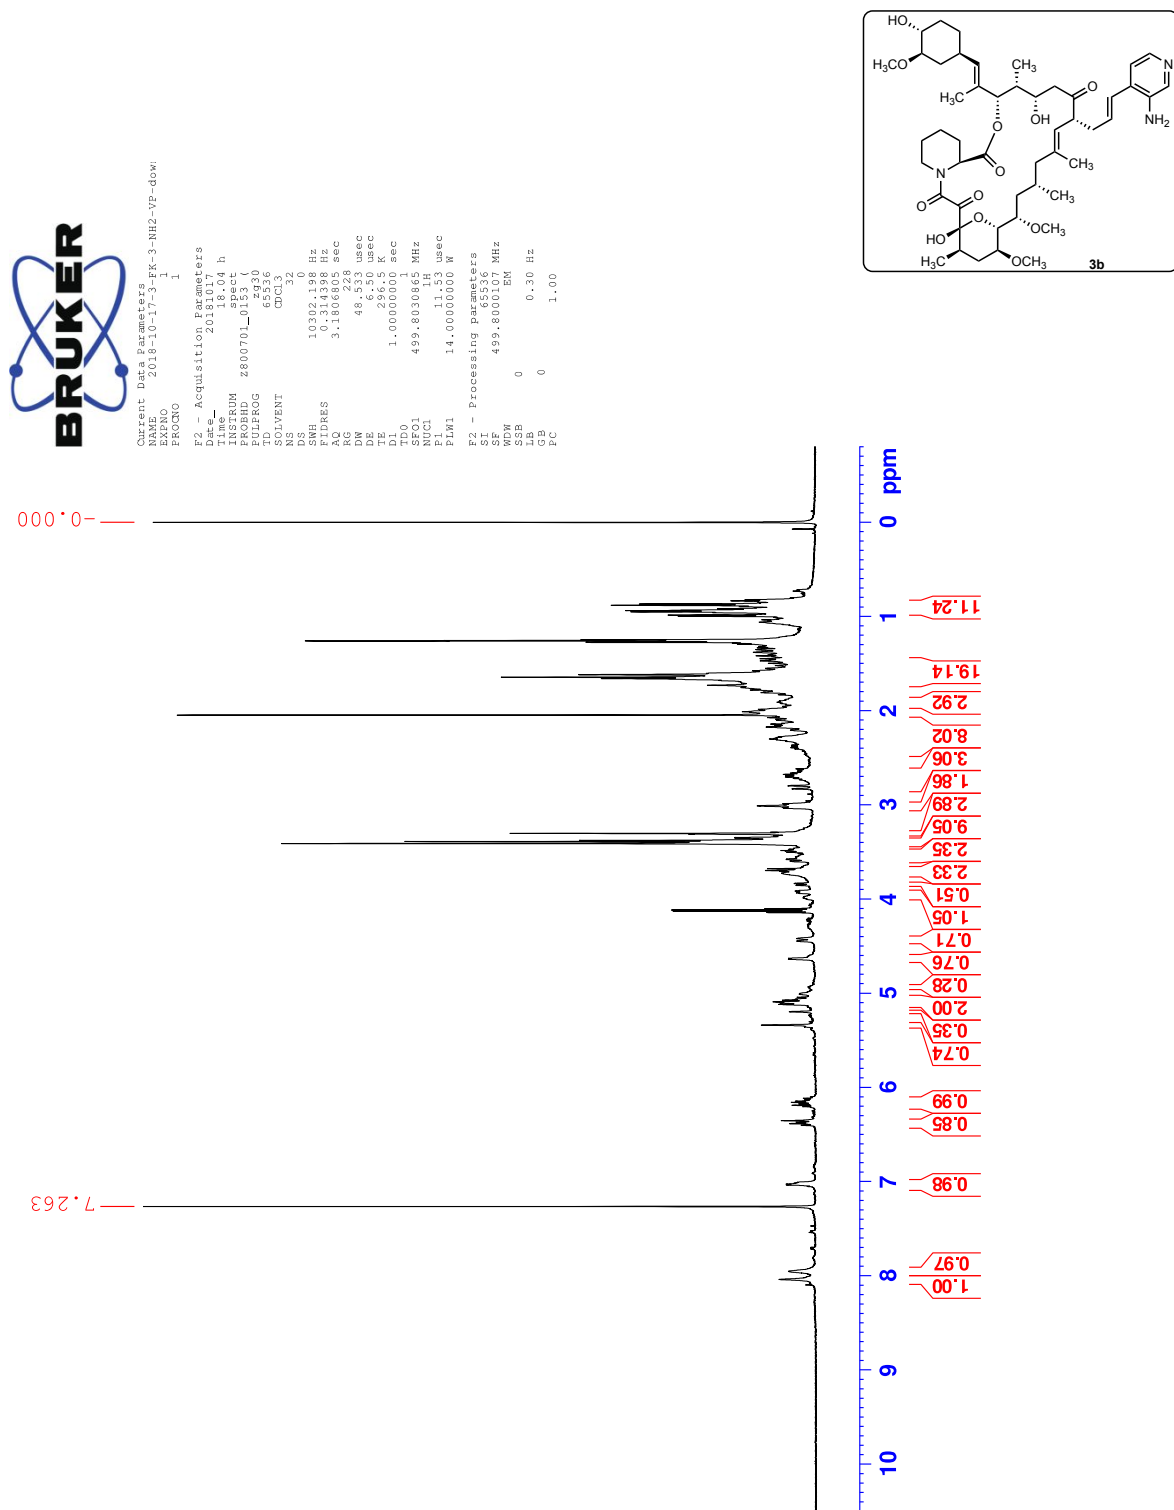

# 5b: <sup>1</sup>H-NMR

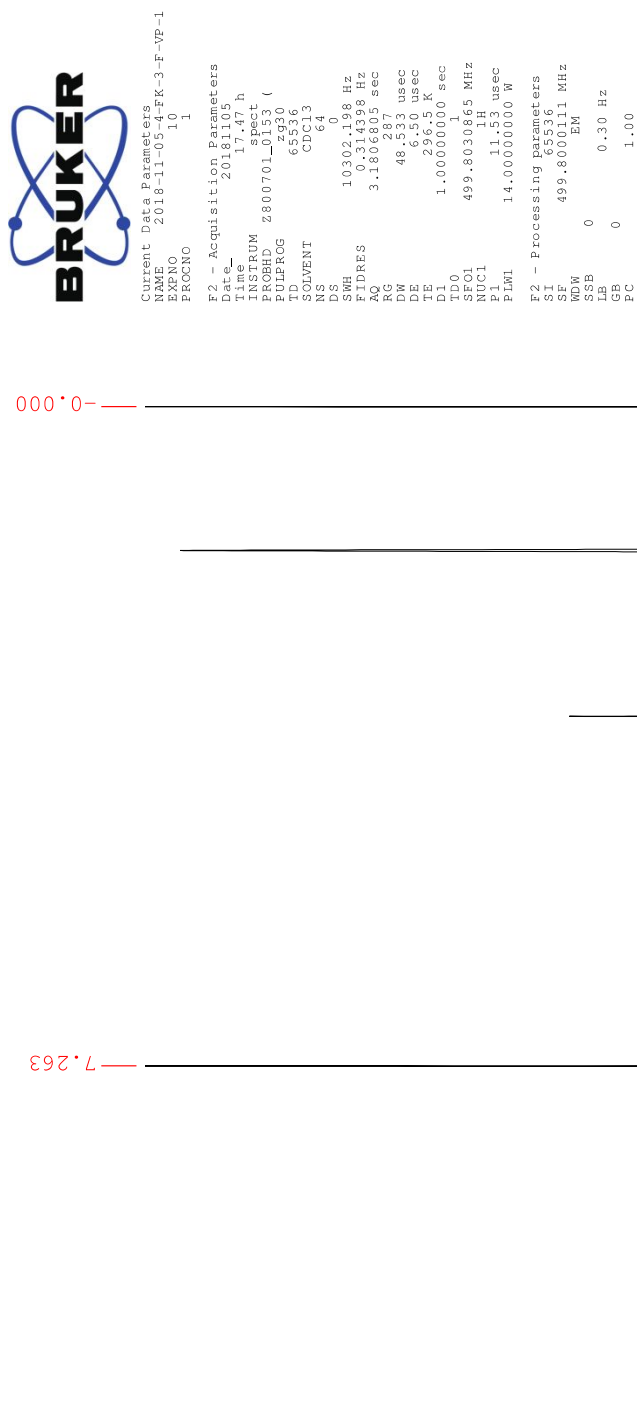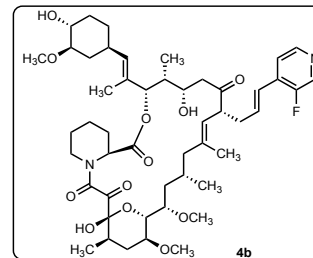

# 9b: <sup>1</sup>H-NMR

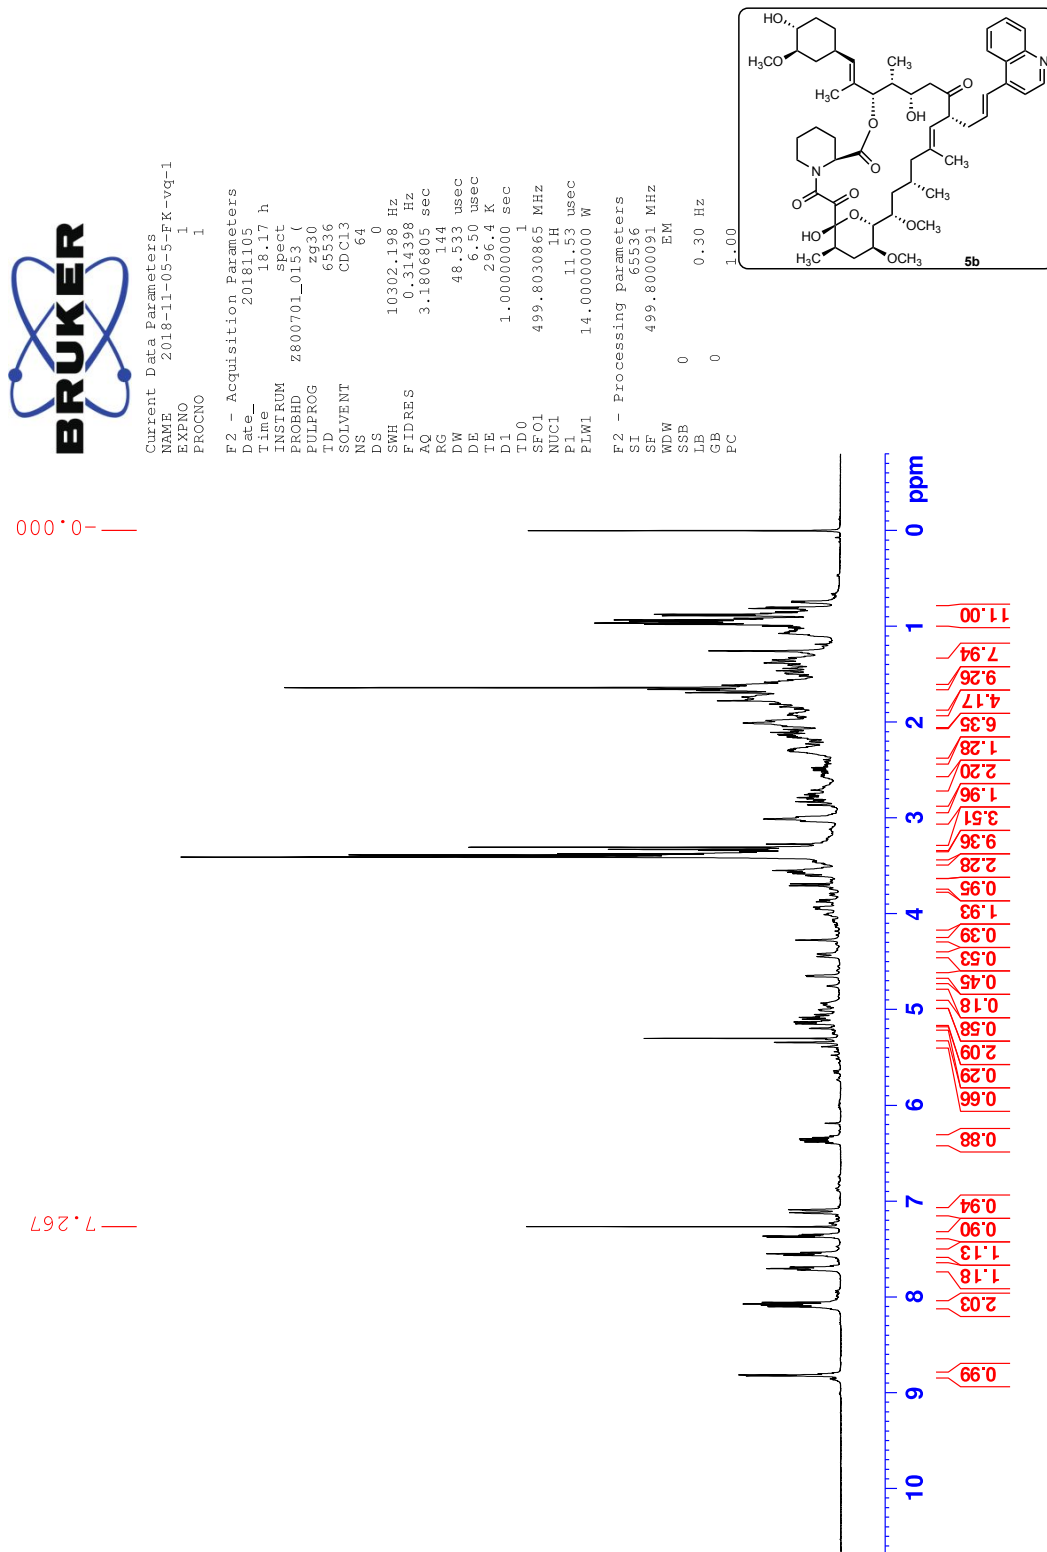

# 7b: <sup>1</sup>H-NMR

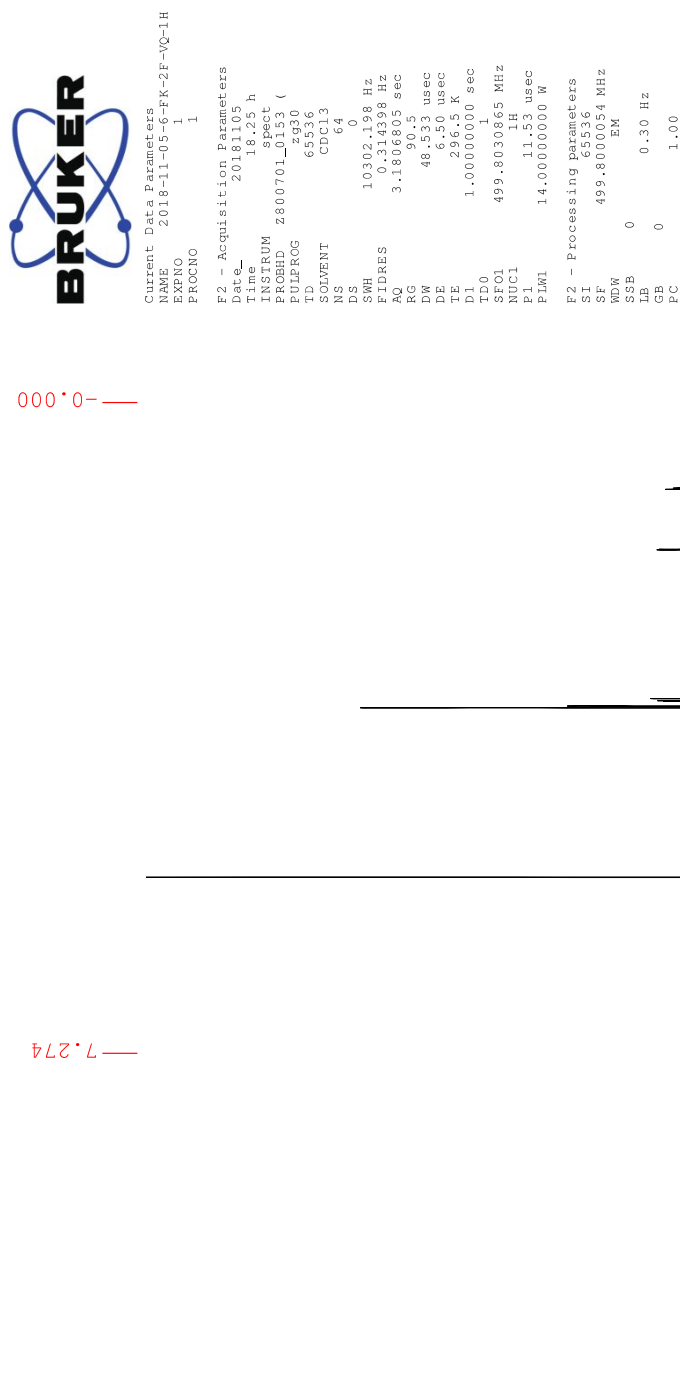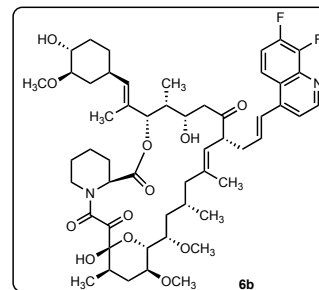



# 8b: <sup>1</sup>H-NMR

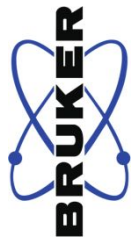

Current Data Parameters  
 NAME 2018-05-15-7-FK-6F-vq-do  
 EXPNO 1  
 PROCNO 1

F2 - Acquisition Parameters

Date\_ 20180515  
 Time 18.57 h  
 INSTRUM spect  
 PROBHD zgpg30  
 PULPROG zgpg30  
 TD 65536  
 SOLVENT CDCl3  
 NS 128  
 DS 0  
 SWH 10302.198 Hz  
 FIDRES 0.314398 Hz  
 RG 3.180000 sec  
 ACQ 223  
 DW 48.533 usec  
 DE 6.50 usec  
 TE 296.5 K  
 D1 1.0000000 sec  
 D11 1.0000000 sec  
 SFO1 499.803085 MHz  
 NUC1 1H  
 P1 11.49 usec  
 PL1 14.0000000 W

F2 - Processing parameters  
 SI 65536  
 SF 499.8000100 MHz  
 RG 3.180000 sec  
 SSF 0  
 LB 0.30 Hz  
 GB 0  
 PC 1.00

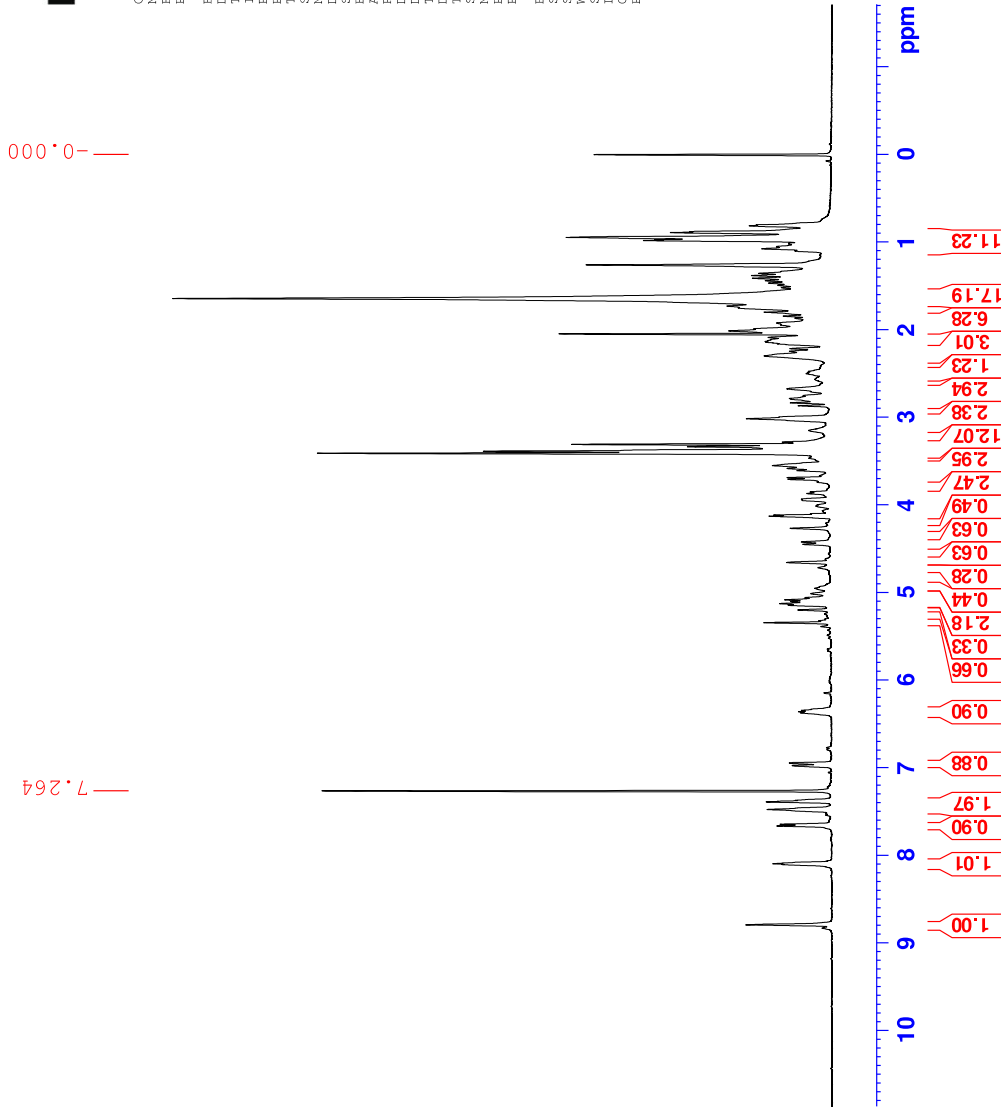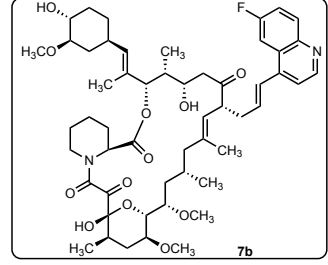

1:

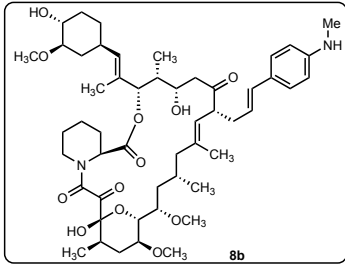

1.

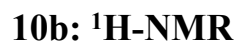

# 11b: <sup>1</sup>H-NMR

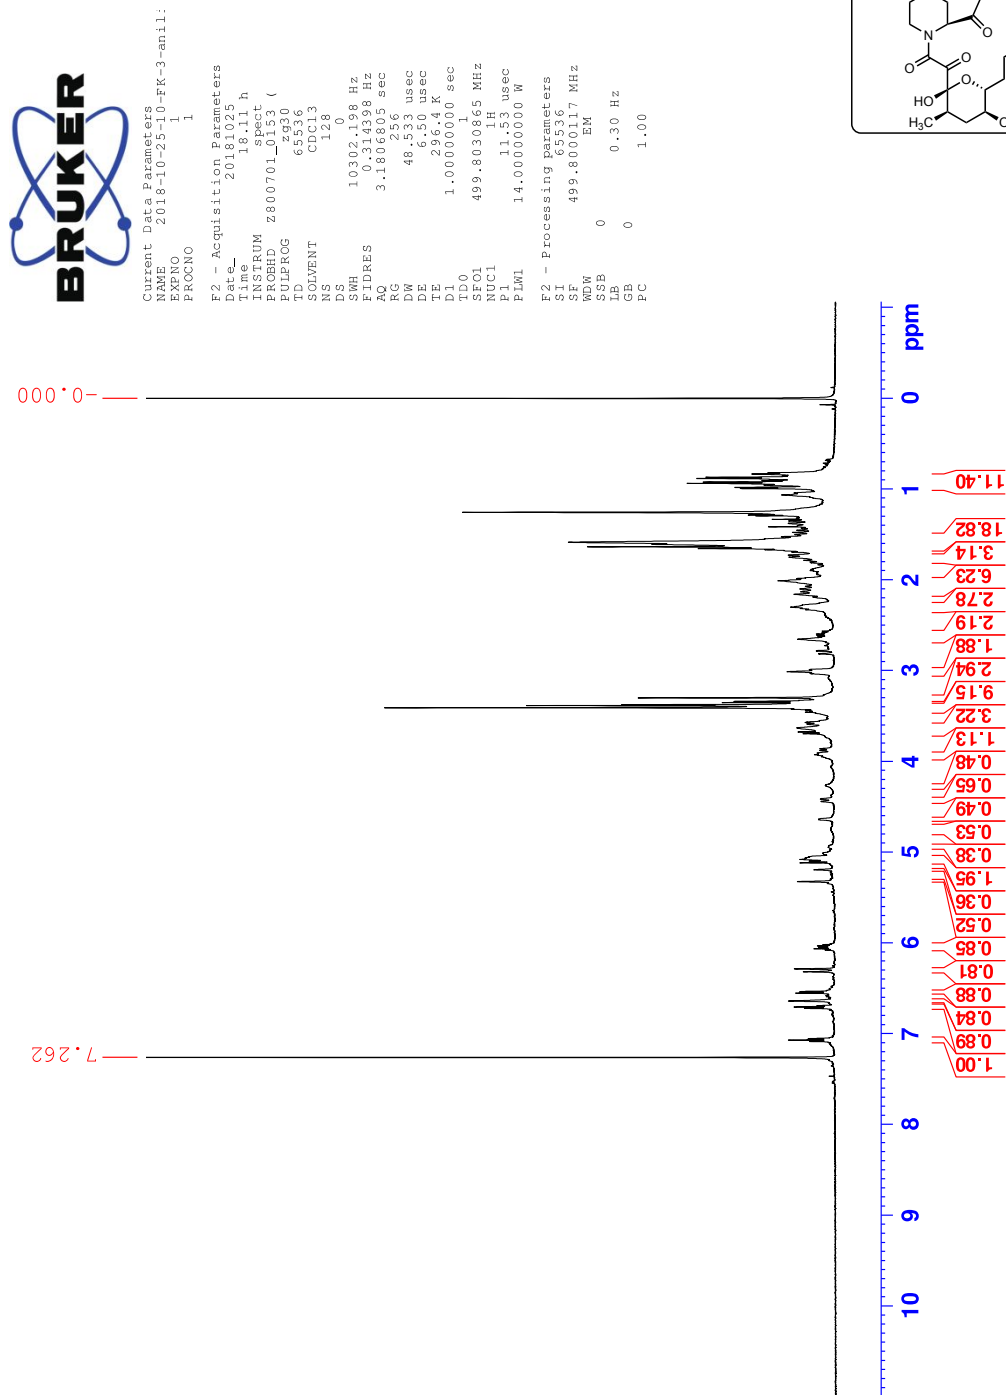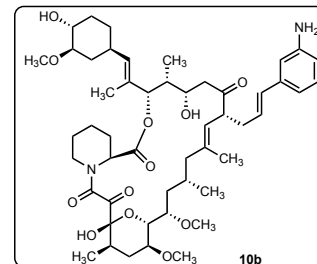

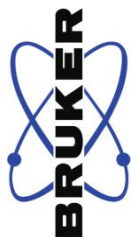

Current Data Parameters  
 NAME 2018-10-25-11-FK-2-anil.  
 EXPNO 1  
 PROCNO 1

F2 - Acquisition Parameters  
 Date\_ 20181025  
 Time 17.58 h  
 INSTRUM spect  
 PULPROG zgpg30  
 PULPRG zgpg30  
 TD 65536  
 SOLVENT CDCl3  
 NS 128  
 DS 0  
 SWH 10302.198 Hz  
 AQ 0.36459 Hz  
 RG 3.160609 sec  
 DW 48.533 usec  
 DE 6.50 usec  
 TE 296.5 K  
 D1 1.00000000 sec  
 D10 1.00000000 sec  
 SFO 499.8030865 MHz  
 NUC1 1H  
 P1 11.53 usec  
 PLW1 14.00000000 W

F2 - Processing parameters  
 SI 65536  
 SF 499.8000006 MHz  
 WDW EM  
 SSB 0  
 LB 0.30 Hz  
 GB 0  
 PC 1.00

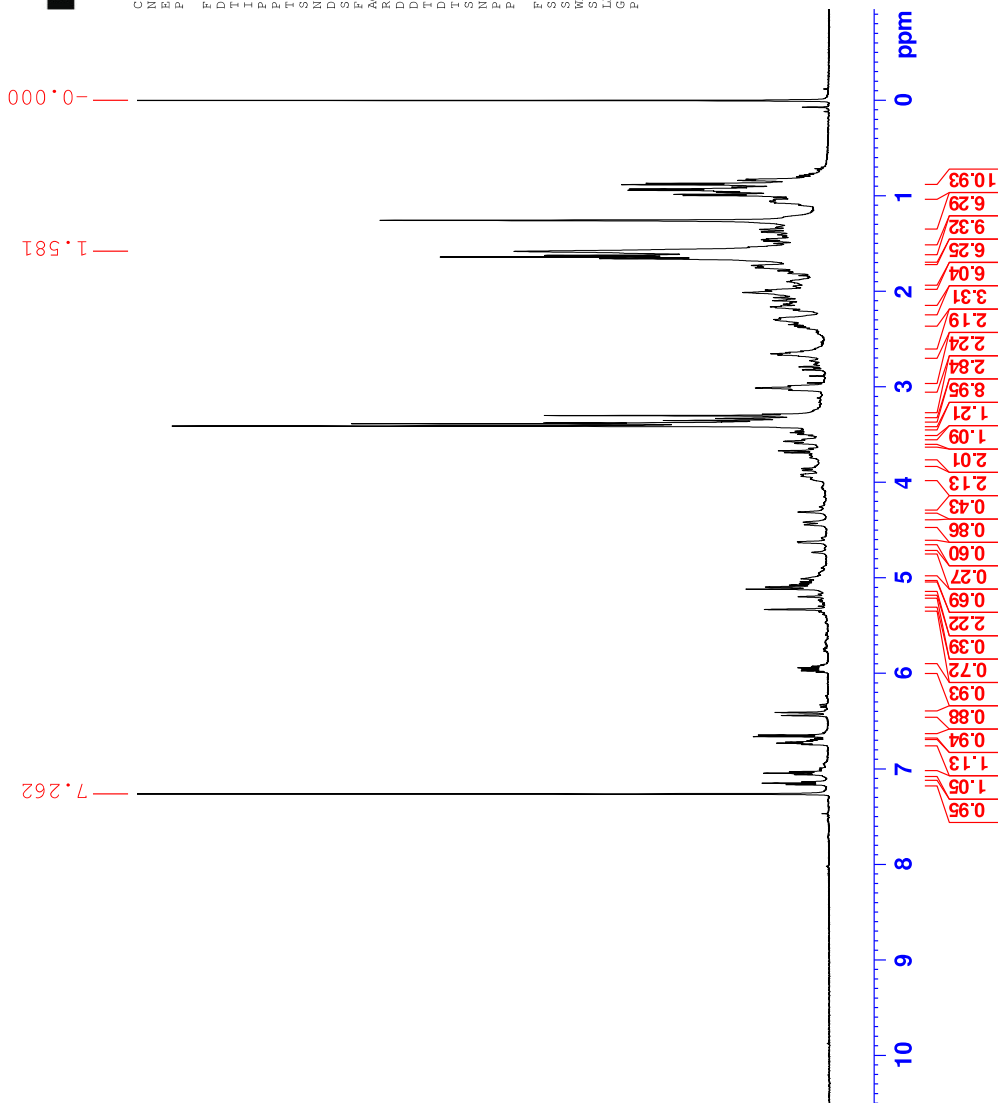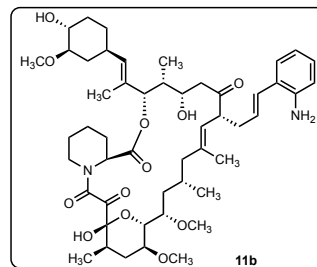

Supplement: Supplementary file 1 [file 17387783]
